# Supplementary material for: Transcriptional and Molecular Pathways Activated in Mesenteric Adipose Tissue and Intestinal Mucosa of Crohn’s Disease Patients
Source: Hindawi journal article supplement (doi:10.1155/2017/7646859), 2017-01-01

**Figure S1. Ponceau-S staining of the Western blot membranes used as loading controls.**

Total protein staining confirmed equal loading in Western blot analysis of TNF $\alpha$ , IL1 $\beta$ , IL10, IL17, IL23, pSTAT1, SOCS3 expressions in intestinal mucosa (A, B) and in mesenteric adipose tissue (C, D) as presented in Figures 3, 5, 6 and 7.

**Supplementary Figure**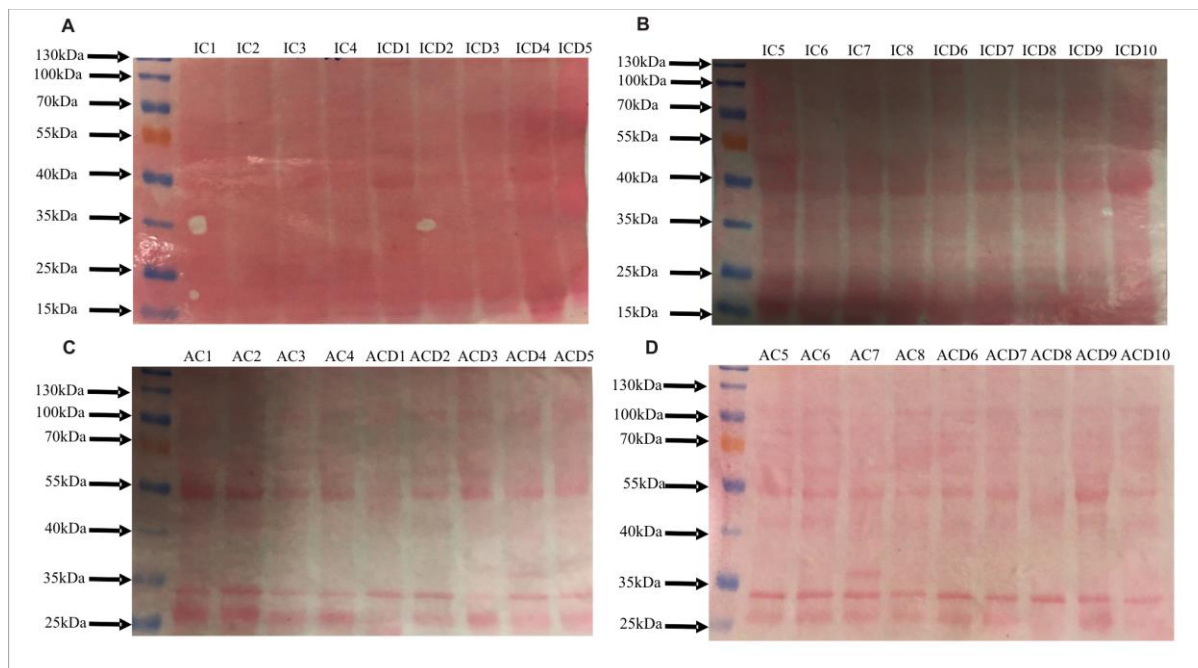

Supplement: f1 [file 7646859.f1.pdf]
